# Supplementary material
Source: publisher figshare collection journal article supplement (https://karger.figshare.com/ndownloader/files/28970043)
Supplement: Supplementary file 1 [file 28970043]

Supplement 1. Risk of comorbidities in PRISm, stratified by Body-mass Index (25kg/m2)

|  | Non-obese (<25kg/m2)  (N=10,963) | Obese (≥25kg/m2)  (N=6,552) |
| --- | --- | --- |
|  | PRISm‡  (N=884) | PRISm‡  (N=679) |
|  | Adjusted OR (95% CI)* | Adjusted OR (95% CI)* |
| Hypertension | 1.27 (1.06-1.52) | 1.32 (1.06-1.64) |
| Diabetes | 1.59 (1.26-2.00) | 1.44(1.15-1.80) |
| Hypercholesterolemia | 1.17 (0.96-1.41) | 1.26 (1.03-1.55) |
| Stroke | 1.38 (0.76-2.45) | 1.56 (0.89-2.74) |
| Ischemic heart disease | 1.29 (0.74-2.26) | 1.90 (1.22-2.95) |
| Chronic kidney disease | 4.48 (1.99-10.12) | 0.85 (1.34-5.34) |
| Thyroid disease | 1.25 (0.88-1.78) | 1.72 (1.14-2.60) |

‡ reference: Normal group
